# Supplementary material for: Evaluation of a personalised adherence intervention to improve photoprotection in adults with Xeroderma Pigmentosum (XP): protocol for the trial of XPAND
Source: BMJ Open. 2019 Jul 17;9(7):e028577. doi: 10.1136/bmjopen-2018-028577 (PMC6661555; doi:10.1136/bmjopen-2018-028577)
Supplement: Supplementary data [file bmjopen-2018-028577supp002.pdf]

|                                                                                                                   |   |   |   |   |   |   |   |   |   |                       |
|-------------------------------------------------------------------------------------------------------------------|---|---|---|---|---|---|---|---|---|-----------------------|
| C. you are in a rush                                                                                              |   |   |   |   |   |   |   |   |   |                       |
| 0                                                                                                                 | 1 | 2 | 3 | 4 | 5 | 6 | 7 | 8 | 9 | 10                    |
| <i>not at all</i>                                                                                                 |   |   |   |   |   |   |   |   |   | <i>very confident</i> |
| D. you are with new people                                                                                        |   |   |   |   |   |   |   |   |   |                       |
| 0                                                                                                                 | 1 | 2 | 3 | 4 | 5 | 6 | 7 | 8 | 9 | 10                    |
| <i>not at all</i>                                                                                                 |   |   |   |   |   |   |   |   |   | <i>very confident</i> |
| E. you don't want to look different                                                                               |   |   |   |   |   |   |   |   |   |                       |
| 0                                                                                                                 | 1 | 2 | 3 | 4 | 5 | 6 | 7 | 8 | 9 | 10                    |
| <i>not at all</i>                                                                                                 |   |   |   |   |   |   |   |   |   | <i>very confident</i> |
| F. you are feeling low                                                                                            |   |   |   |   |   |   |   |   |   |                       |
| 0                                                                                                                 | 1 | 2 | 3 | 4 | 5 | 6 | 7 | 8 | 9 | 10                    |
| <i>not at all</i>                                                                                                 |   |   |   |   |   |   |   |   |   | <i>very confident</i> |
| G. you are feeling happy                                                                                          |   |   |   |   |   |   |   |   |   |                       |
| 0                                                                                                                 | 1 | 2 | 3 | 4 | 5 | 6 | 7 | 8 | 9 | 10                    |
| <i>not at all</i>                                                                                                 |   |   |   |   |   |   |   |   |   | <i>very confident</i> |
| H. you are pressured not to protect by family or friends                                                          |   |   |   |   |   |   |   |   |   |                       |
| 0                                                                                                                 | 1 | 2 | 3 | 4 | 5 | 6 | 7 | 8 | 9 | 10                    |
| <i>not at all</i>                                                                                                 |   |   |   |   |   |   |   |   |   | <i>very confident</i> |
| I. It might be physically uncomfortable (e.g., too hot)                                                           |   |   |   |   |   |   |   |   |   |                       |
| 0                                                                                                                 | 1 | 2 | 3 | 4 | 5 | 6 | 7 | 8 | 9 | 10                    |
| <i>not at all</i>                                                                                                 |   |   |   |   |   |   |   |   |   | <i>very confident</i> |
| 5. How confident you are that you will correctly apply sunscreen to your face over the next 4 weeks even if/when: |   |   |   |   |   |   |   |   |   |                       |
| A. unexpected things get in the way                                                                               |   |   |   |   |   |   |   |   |   |                       |
| 0                                                                                                                 | 1 | 2 | 3 | 4 | 5 | 6 | 7 | 8 | 9 | 10                    |
| <i>not at all</i>                                                                                                 |   |   |   |   |   |   |   |   |   | <i>very confident</i> |

B. you are somewhere new

|                   |   |   |   |   |   |   |   |   |   |                       |
|-------------------|---|---|---|---|---|---|---|---|---|-----------------------|
| 0                 | 1 | 2 | 3 | 4 | 5 | 6 | 7 | 8 | 9 | 10                    |
| <i>not at all</i> |   |   |   |   |   |   |   |   |   | <i>very confident</i> |

C. you are in a rush

|                   |   |   |   |   |   |   |   |   |   |                       |
|-------------------|---|---|---|---|---|---|---|---|---|-----------------------|
| 0                 | 1 | 2 | 3 | 4 | 5 | 6 | 7 | 8 | 9 | 10                    |
| <i>not at all</i> |   |   |   |   |   |   |   |   |   | <i>very confident</i> |

D. you are with new people

|                   |   |   |   |   |   |   |   |   |   |                       |
|-------------------|---|---|---|---|---|---|---|---|---|-----------------------|
| 0                 | 1 | 2 | 3 | 4 | 5 | 6 | 7 | 8 | 9 | 10                    |
| <i>not at all</i> |   |   |   |   |   |   |   |   |   | <i>very confident</i> |

E. you don't want to look different

|                   |   |   |   |   |   |   |   |   |   |                       |
|-------------------|---|---|---|---|---|---|---|---|---|-----------------------|
| 0                 | 1 | 2 | 3 | 4 | 5 | 6 | 7 | 8 | 9 | 10                    |
| <i>not at all</i> |   |   |   |   |   |   |   |   |   | <i>very confident</i> |

F. you are feeling low

|                   |   |   |   |   |   |   |   |   |   |                       |
|-------------------|---|---|---|---|---|---|---|---|---|-----------------------|
| 0                 | 1 | 2 | 3 | 4 | 5 | 6 | 7 | 8 | 9 | 10                    |
| <i>not at all</i> |   |   |   |   |   |   |   |   |   | <i>very confident</i> |

G. you are feeling happy

|                   |   |   |   |   |   |   |   |   |   |                       |
|-------------------|---|---|---|---|---|---|---|---|---|-----------------------|
| 0                 | 1 | 2 | 3 | 4 | 5 | 6 | 7 | 8 | 9 | 10                    |
| <i>not at all</i> |   |   |   |   |   |   |   |   |   | <i>very confident</i> |

H. you are pressured not to protect by family or friends

|                   |   |   |   |   |   |   |   |   |   |                       |
|-------------------|---|---|---|---|---|---|---|---|---|-----------------------|
| 0                 | 1 | 2 | 3 | 4 | 5 | 6 | 7 | 8 | 9 | 10                    |
| <i>not at all</i> |   |   |   |   |   |   |   |   |   | <i>very confident</i> |

I. It might be physically uncomfortable (e.g., sticky)

|                   |   |   |   |   |   |   |   |   |   |                       |
|-------------------|---|---|---|---|---|---|---|---|---|-----------------------|
| 0                 | 1 | 2 | 3 | 4 | 5 | 6 | 7 | 8 | 9 | 10                    |
| <i>not at all</i> |   |   |   |   |   |   |   |   |   | <i>very confident</i> |
